1 **Idiosyncratic variation in the fitness costs of tetracycline-resistance mutations**  
2 **in *Escherichia coli***

3  
4 **Kyle J. Card,<sup>1,2,3,4</sup> Jalin A. Jordan,<sup>3,5</sup> and Richard E. Lenski<sup>1,2,3</sup>**

5 <sup>1</sup> *Department of Microbiology and Molecular Genetics, Michigan State University, East Lansing,*  
6 *Michigan*

7 <sup>2</sup> *Program in Ecology, Evolution, and Behavior, Michigan State University, East Lansing,*  
8 *Michigan*

9 <sup>3</sup> *BEACON Center for the Study of Evolution in Action, Michigan State University, East Lansing,*  
10 *Michigan*

11 <sup>4</sup> *E-mail: [cardkyle@msu.edu](mailto:cardkyle@msu.edu)*

12 <sup>5</sup> *Department of Chemistry, Michigan State University, East Lansing, Michigan*

13

14 **Running title:** *Idiosyncratic costs of resistance*

15

16 **Author contributions:** K.J.C. and R.E.L. conceived of and designed the study; K.J.C. and J.J.  
17 performed the experiments; K.J.C. and R.E.L. analyzed all data; K.J.C. wrote the associated  
18 analysis script and prepared figures; K.J.C. and R.E.L. wrote the paper. All authors approved the  
19 final version.

20

21 **Acknowledgments:** We thank Chris Adami, Jeff Barrick, Frances Downes, Joshua Franklin, and  
22 Chris Waters for valuable discussions and advice, and Devin Lake for general assistance in the  
23 laboratory. We acknowledge financial support from an HHMI Gilliam Fellowship (to K.J.C.); a  
24 Ralph Evans Award from the MSU Department of Microbiology and Molecular Genetics (to  
25 K.J.C.); an NSF grant (currently DEB-1951307 to R.E.L.); a USDA Hatch grant (MICL02253 to  
26 R.E.L.); and the BEACON Center for the Study of Evolution in Action (NSF cooperative  
27 agreement DBI-0939454).

28

29 **Data availability:** All data and analysis code for this study are available on GitHub  
30 (<https://github.com/KyleCard/LTEE-fitness-costs-of-resistance>).

31

32 **Conflict of interest statement:** The authors declare that no competing interests exist.

33 *Abstract*

34 A bacterium's fitness relative to its competitors, both in the presence and absence of antibiotics,  
35 plays a key role in its ecological success and clinical impact. In this study, we examine whether  
36 tetracycline-resistant mutants are less fit in the absence of the drug than their sensitive parents,  
37 and whether the fitness cost of resistance is constant or variable across independently derived  
38 lines. Tetracycline-resistant lines suffered, on average, a reduction in fitness of almost 8%. There  
39 was substantial among-line variation in the fitness cost. This variation was not associated with  
40 the level of phenotypic resistance conferred by the mutations, nor did it vary significantly across  
41 several different genetic backgrounds. The two resistant lines with the most extreme fitness costs  
42 involved functionally unrelated mutations on different genetic backgrounds. However, there was  
43 also significant variation in the fitness costs for mutations affecting the same pathway and even  
44 different alleles of the same gene. Our findings demonstrate that the fitness costs of antibiotic  
45 resistance do not always correlate with the phenotypic level of resistance or the underlying  
46 genetic changes. Instead, these costs reflect the idiosyncratic effects of particular resistance  
47 mutations and the genetic backgrounds in which they occur.

48

49 **KEY WORDS:** antimicrobial resistance, epistasis, genetic background, pleiotropy, relative  
50 fitness, tradeoffs

## 51 *Introduction*

52 Antibiotics are an essential component of modern medicine. Although they have dramatically  
53 reduced the morbidity and mortality caused by severe bacterial infections, their benefits have  
54 diminished in recent years because of their overuse in the clinic and in agriculture, which has led  
55 to the evolution and proliferation of antibiotic-resistant pathogens. As a result, many infections  
56 have become more difficult to treat with mainline drug therapies, and in severe cases, some  
57 pathogenic strains have become resistant to all available drugs. An understanding of the forces  
58 underlying and shaping antibiotic resistance is therefore critical to the future health of the human  
59 population.

60 Bacteria can evolve resistance by either spontaneous mutations or horizontal acquisition  
61 of resistance genes. Spontaneous mutations commonly confer resistance by altering the cellular  
62 target of the antibiotic or increasing its efflux (Blair et al. 2015). Mechanisms associated with  
63 horizontal gene transfer include target modification, drug detoxification, and the acquisition of  
64 novel efflux pumps (Blair et al. 2015). In either case, resistant variants have a clear advantage  
65 over their sensitive counterparts when exposed to the corresponding antibiotic. However, these  
66 resistant types often suffer fitness costs because they disrupt the normal functioning of metabolic  
67 pathways and physiological processes or increase the energetic burden on the cell (Lenski and  
68 Bouma 1987; Nguyen et al. 1989; Andersson and Hughes 2010; Vogwill and MacLean 2015).  
69 Resistant types should therefore have lower growth rates than, and be outcompeted by, their  
70 sensitive counterparts in the absence of drugs.

71 A resistant bacterium's competitive fitness, both in the presence and absence of a drug, is  
72 an important factor that contributes to its ecological success and thus its clinical impact (Lenski  
73 1997; Vogwill and MacLean 2015; Hughes and Andersson 2017). For example, the fitness of a

74 resistance mutation determines its likelihood of persisting in a bacterial population prior to drug  
75 exposure, its maintenance in a population at a particular drug concentration, and its reversibility  
76 when the antibiotic is reduced or removed from the environment (Hughes and Andersson 2017;  
77 Santos-Lopez et al. 2019).

78         The expected time required to reduce the frequency of a resistant mutant in a bacterial  
79 population following the cessation of antibiotic use is inversely proportional to the fitness cost of  
80 the resistance mutation (Lenski 1997). Although mathematical models can predict the rate of  
81 these frequency declines (Levin et al. 1997), these theoretical expectations often are not met  
82 under real-world scenarios for at least two reasons. First, some resistance mechanisms are  
83 inherently cost free, at least in certain environments. Several mutations in the gene *rpsL* confer  
84 resistance to streptomycin, but they have little or no fitness cost in both *Escherichia coli* and  
85 *Salmonella typhimurium* (Tubulekas and Hughes 1993), and they even confer a competitive  
86 advantage over wild-type strains in some animal infection models (Björkman et al. 1998; Enne et  
87 al. 2005). These cost-free *rpsL* mutations are also found in streptomycin-resistant  
88 *Mycobacterium tuberculosis* populations, where they may facilitate the long-term maintenance  
89 of this resistant type (Böttger et al. 1998; Andersson and Hughes 2010). Similarly, treatment of  
90 *Helicobacter pylori* infections with clarithromycin has been found to select for highly resistant  
91 commensal *Enterococcus* species that persist for years after drug treatment (Sjölund et al. 2003).  
92 This last outcome demonstrates a troubling side-effect of antibiotic use, in which the microbiome  
93 can act as both a reservoir for resistance genes and as a conduit for their horizontal transfer to  
94 pathogens (Sommer et al. 2010).

95         Second, pleiotropic costs associated with chromosomal- or plasmid-mediated resistance  
96 can often be reduced or even eliminated through subsequent compensatory evolution (Bouma

97 and Lenski 1988; Schrag et al. 1997; Kugelberg et al. 2005; Nilsson et al. 2006; Andersson and  
98 Hughes 2010; Barrick et al. 2010). For example, clinically relevant levels of fluoroquinolone  
99 resistance occur through the sequential substitution of mutations in several genes (Lindgren et al.  
100 2003). Early genetic changes in the mutational pathway exact a cost on bacterial growth in both  
101 laboratory media and mouse models, but the cost can be ameliorated through later resistance  
102 mutations (Marcusson et al. 2009). Thus, evolution can restore a bacterial population's ancestral  
103 growth rate in the absence of drug selection while simultaneously preserving resistance in the  
104 event of future exposure to antibiotics. Moreover, compensatory evolution can sometimes drive  
105 multidrug resistance; this outcome has been seen when a genetic change simultaneously provides  
106 resistance to a newly imposed drug while reducing the fitness cost associated with resistance to a  
107 previous antibiotic (Trindade et al. 2009). Compensatory evolution shows how pleiotropic  
108 effects of one mutation can set the stage for epistatic interactions with subsequent mutations.

109         In general, a bacterium's genetic background can influence the fitness costs of antibiotic  
110 resistance. For example, Vogwill and colleagues (2016) examined the costs of rifampicin-  
111 resistance mutations in the gene *rpoB* across several *Pseudomonas* species. They found that  
112 some mutations vary in their fitness effects across backgrounds, and these costs correlate with  
113 transcriptional efficiency. Thus, the same *rpoB* mutation can differentially affect transcriptional  
114 efficiency depending on the genetic background, and these idiosyncratic effects in turn lead to  
115 heterogeneity in costs. This work evaluated genetic-background effects across a fairly broad  
116 phylogenetic scale, while focusing on mutations in a single gene. One can also ask whether  
117 genetic background affects the fitness cost of resistance even among recently diverged clones of  
118 a single species, and for resistance that has evolved through more diverse mutational pathways.

119           To address these issues, we evaluated the competitive fitness in the absence of drugs of  
120 tetracycline-resistant clones that evolved from several different *E. coli* backgrounds, which  
121 previously diverged during a long-term evolution experiment (LTEE). We ask several questions.  
122 First, is there a fitness cost to resistance? Second, is the cost greater for mutants that evolved  
123 higher levels of resistance (Fig. 1A)? Third, do fitness costs vary in an idiosyncratic manner that  
124 does not depend on the level of resistance achieved (Fig. 1B)? Fourth, if there is indeed  
125 idiosyncratic variation among lines in the cost of resistance, what factors contribute to that  
126 variability? On balance, we found that the resistant lines are indeed less fit than their sensitive  
127 counterparts. These fitness costs do not correlate with the level of resistance achieved, nor do  
128 they vary among the several genetic backgrounds that we examined (Card et al. 2019). Some  
129 variation in cost of resistance occurs even among different mutations in the same gene, on the  
130 same genetic background, and conferring the same phenotypic resistance. In any case, further  
131 research on the fitness effects of antibiotic resistance should be pursued because of its potential  
132 implications for public health and patient treatment.

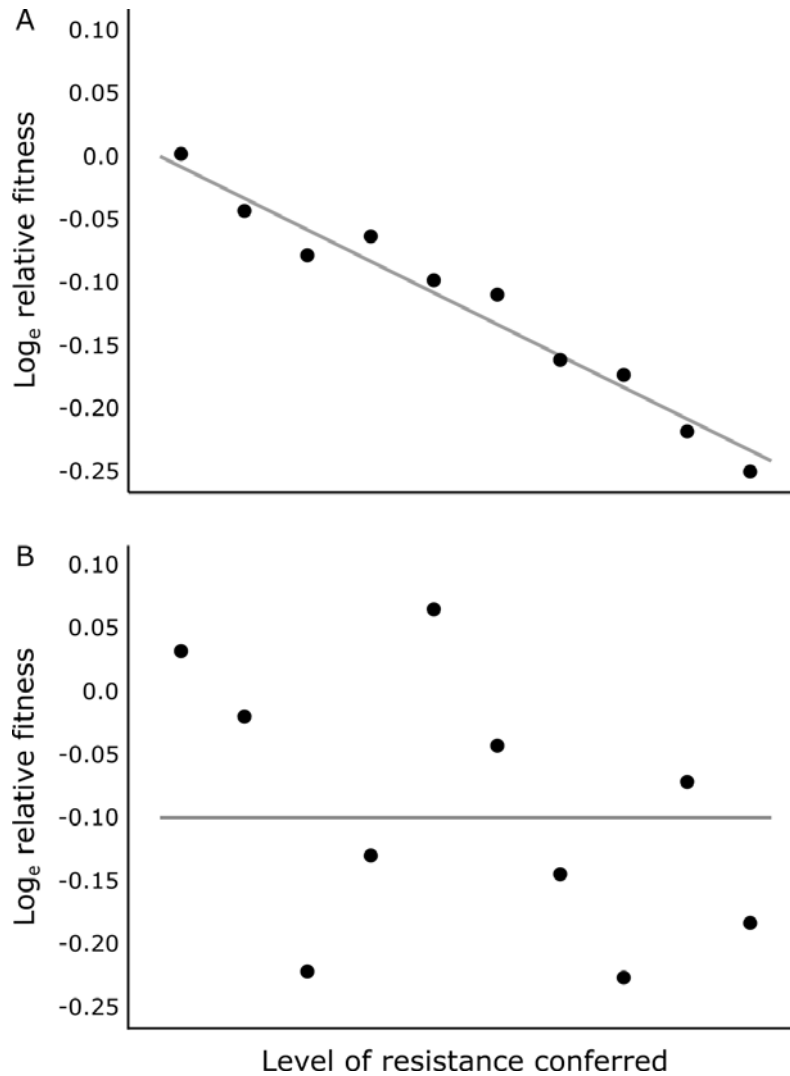

133

134 **Figure 1.** Schematic illustration of fitness effects of antibiotic resistance mutations under two  
135 scenarios. (A) Tradeoff model, in which the fitness of a resistant line, when measured in the  
136 absence of drugs, is negatively correlated with the level of resistance conferred by its mutations.  
137 (B) Idiosyncratic model, in which the fitness of resistant lines varies for reasons unrelated to the  
138 level of resistance. This idiosyncratic variation might, in principle, reflect differences between  
139 genetic backgrounds, mutations in different target genes, different alleles of the same target gene,  
140 secondary mutations, and epistatic interactions between the resistance mutations and their  
141 genetic backgrounds. The fitness of each resistant line is expressed relative to its sensitive  
142 counterpart. A log-transformed relative fitness of 0 indicates no fitness cost associated with  
143 resistance, while values below and above 0 represent fitness costs and benefits, respectively.

144 *Materials and Methods*

145 **EXPERIMENTAL CONDITIONS AND BACTERIAL STRAINS**

146 The LTEE has been described in detail elsewhere (Lenski et al. 1991; Lenski 2017). In brief, 12  
147 replicate populations of *E. coli* were founded from a common ancestral strain, called REL606  
148 (Daegelen et al. 2009). These populations have been propagated for over 32 years and 73,000  
149 generations by daily 100-fold dilutions in Davis Mingioli minimal medium supplemented with  
150 25 µg/mL glucose (DM25).

151 In this study, we examined the competitive fitness of tetracycline-resistant mutants that  
152 evolved from the LTEE ancestor and clones sampled from four LTEE populations (denoted Ara–  
153 5, Ara–6, Ara+4, and Ara+5) after 50,000 generations. Specifically, we analyzed 4 mutants that  
154 independently evolved from the ancestral background, and 3 mutants that evolved from each  
155 derived background, for a total of 16 mutants (Table S1). We also used three clones as common  
156 competitors: REL607, REL10948, and REL11638. REL607 is a spontaneous Ara<sup>+</sup> mutant of  
157 REL606, the LTEE ancestor (Lenski et al. 1991). REL10948 is an Ara<sup>–</sup> clone isolated from the  
158 Ara–5 population at 40,000 generations, and REL11638 is a spontaneous Ara<sup>+</sup> mutant of that  
159 clone (Wiser et al. 2013; Lenski et al. 2015). The Ara marker is selectively neutral in the  
160 glucose-limited medium; it serves to differentiate competitors during fitness assays because the  
161 Ara<sup>–</sup> and Ara<sup>+</sup> cells form red and white colonies, respectively, on tetrazolium-arabinose (TA)  
162 agar. We used REL607 as the common competitor for REL606 and the four tetracycline-resistant  
163 clones derived from it. The 40,000-generation clones served as common competitors for the four  
164 50,000-generation parental clones and twelve resistant mutants that evolved from them; using  
165 these common competitors ensured that the differences in fitness were not so large that their  
166 densities would fall below the detection limit during the fitness assays.



167 **FITNESS ASSAYS**

168 Assays were performed in the absence of antibiotics to assess the relative fitness of drug-resistant  
169 mutants and their susceptible counterparts. Fitness was measured in an environment identical to  
170 that of the LTEE, except the medium contained 250  $\mu\text{g}/\text{mL}$  glucose (DM250). Resistant mutants  
171 and their sensitive parents each competed, in paired assays, against the same common competitor  
172 with the opposite Ara-marker state (Fig. 2). To set up each competition assay, the competitors  
173 were revived from frozen stocks, and they were separately acclimated to the culture medium and  
174 other conditions over two days. The competitors were then each diluted 1:200 into fresh medium,  
175 and a sample was immediately plated on TA agar to assess their initial densities based on colony  
176 counts. The competition cultures were then propagated for 3 days, with 1:100 dilutions each day  
177 in fresh medium. At the end of day 3, a sample was plated on TA agar to assess the competitors'  
178 final densities. We quantified the realized growth rate of each competitor based on its initial and  
179 final density and the net dilutions imposed (Lenski et al. 1991). We then calculated relative  
180 fitness as the ratio of the realized growth rate of the clone of interest (either a resistant clone or  
181 its sensitive parent) to that of the common competitor. Lastly, the fitness of a resistant mutant in  
182 each assay was normalized by dividing it by the relative fitness of the paired assay obtained for  
183 its parental strain. We performed a total of 80 pairs of fitness assays (160 competitions in total)  
184 to produce 5 replicate estimates of the fitness of each of the 16 tetracycline-resistant mutants  
185 relative to its sensitive parent. The relative fitness values were  $\log_e$ -transformed before the  
186 statistical analyses reported in the Results below.

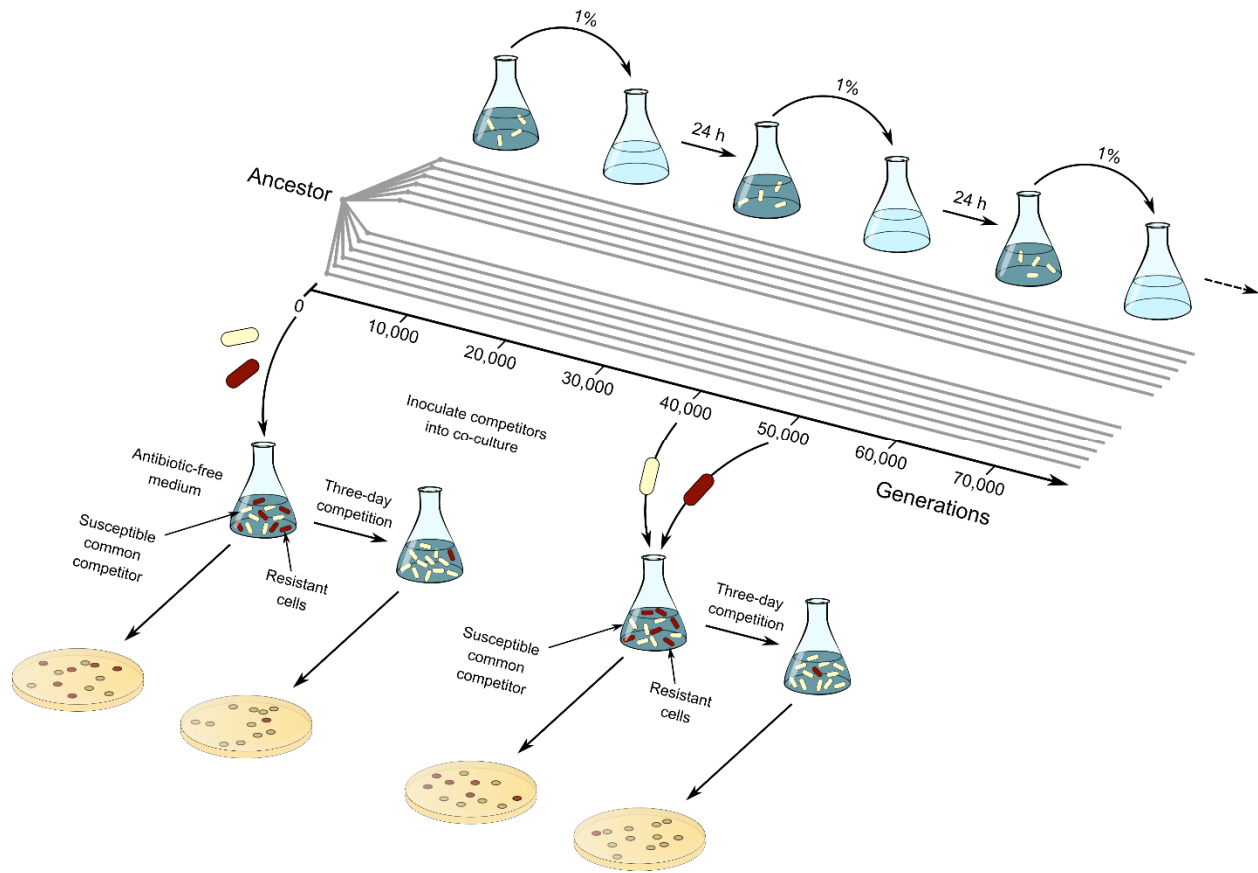

187

188 **Figure 2.** Schematic illustration showing the derivation of the strains used in this study and the  
189 methods employed to measure the fitness of resistant lines relative to their sensitive parents.  
190 Twelve initially identical *E. coli* populations were founded from the same ancestral strain to start  
191 the LTEE. A genetic marker distinguishes two sets of six populations each. These populations  
192 have evolved for >73,000 generations with daily transfers in a minimal glucose medium. In  
193 paired assays, we examined the fitness of tetracycline-resistant mutants (shown in red) that  
194 evolved either from the LTEE ancestor or one of four clones sampled at generation 50,000 by  
195 competing them against marked susceptible competitors (shown in yellow). We used REL607 as  
196 the common competitor for the LTEE ancestor and resistant lines evolved from it, and two  
197 40,000-generation clones (see Materials and Methods) as common competitors for the derived  
198 parental strains and their evolved resistant lines. After acclimation to the culture conditions,  
199 competitors were mixed at an equal volumetric ratio in a common medium. These cultures were  
200 propagated for three days in the absence of tetracycline by serial 1:100 transfers. We quantified  
201 each competitor's realized growth rate from the initial and final densities after plating on TA  
202 agar, taking into account the net dilution over the three days. These realized growth rates were  
203 then used to calculate the fitness of a resistant line relative to its sensitive parent (see Materials  
204 and Methods).

205 *Results*

206 **TETRACYCLINE-RESISTANT LINES HAVE REDUCED FITNESS IN THE ABSENCE**  
207 **OF THE ANTIBIOTIC**

208 We ask first whether tetracycline resistance is costly, on average, in the absence of the drug. The  
209 grand mean of the  $\log_e$ -transformed fitness of the 16 resistant lines relative to their paired  
210 parental strains is -0.0771, indicating that the resistant mutants grow ~7.7% more slowly than  
211 their sensitive counterparts during head-to-head competitions with a common competitor. This  
212 value differs significantly from the null hypothesis that the resistant lines and their sensitive  
213 parents are equally fit ( $t_s = 2.9973$ , 15 d.f., one-tailed  $p = 0.0045$ ).

214

215 **COST OF RESISTANCE VARIES AMONG RESISTANT MUTANTS**

216 We measured the relative fitness of each resistant line with 5-fold replication. This replication  
217 allows us to test whether the variation in fitness among the 16 tetracycline-resistant lines is  
218 simply measurement noise or, alternatively, reflects genetic variation in the cost of resistance.  
219 Table 1 shows the analysis of variance (ANOVA). The variation among the 16 lines is about 10-  
220 fold greater than expected from the variation between replicate assays performed on the same  
221 line ( $F_{15,64} = 10.34$ ,  $p \ll 0.0001$ ).

222 **Table 1.** ANOVA on the log-transformed fitness estimates of 16 tetracycline-resistant lines, each  
223 measured relative to its sensitive parent.

| Source       | SS     | d.f. | MS     | <i>F</i> | <i>p</i>  |
|--------------|--------|------|--------|----------|-----------|
| <b>Line</b>  | 0.7948 | 15   | 0.0530 | 10.3384  | << 0.0001 |
| <b>Error</b> | 0.3280 | 64   | 0.0051 |          |           |
| <b>Total</b> | 1.1228 | 79   |        |          |           |

224

225 There are many possible reasons why the cost of resistance might vary including  
226 mutations in different genes, different alleles even of the same gene, different genetic  
227 backgrounds, epistatic interactions between mutations and genetic backgrounds, and so on. In the  
228 sections that follow, we examine various possibilities.

229

230 **POSSIBLE REVERSIONS OF UNSTABLE MUTATIONS DO NOT EXPLAIN THE**  
231 **VARIATION IN FITNESS COST**

232 We previously sequenced the complete genomes of the 16 resistant lines, and we compared them  
233 to their parental strains to identify the mutations responsible for their resistance (Card et al.  
234 2020). Two lines had no identifiable mutations (Ara-5-1 and Ara+5-1), even though they had  
235 increased phenotypic resistance relative to their respective parent strains (Card et al. 2019). This  
236 discrepancy suggested that these two resistant lines may have had unstable genetic changes,  
237 which might have reverted prior to the genomic analysis and our fitness assays. Potentially  
238 unstable mutations include changes in the copy number of oligonucleotide repeats and gene  
239 amplifications. We repeated the ANOVA, except excluding the two resistant lines without

240 identifiable mutations. The variation in the cost of resistance remains highly significant in the 14  
241 lines with known, stable mutations ( $F_{13,56} = 10.15$ ,  $p \ll 0.0001$ ).

242

## 243 **LEVEL OF PHENOTYPIC RESISTANCE DOES NOT EXPLAIN THE VARIATION IN** 244 **FITNESS COST**

245 All of the resistant lines evolved during a single round of exposure to tetracycline. However,  
246 they vary in the resulting minimum inhibitory concentration (MIC) that they achieved. They also  
247 vary in the magnitude of the increase in their MICs relative to their parental strains, which also  
248 varied in their MICs. It is possible that mutations that provide greater resistance have higher  
249 fitness costs (Fig. 1A). To test that possibility, we examined the correlation between the log-  
250 transformed fitness values of the 14 resistant lines and their log-transformed MICs, as previously  
251 reported (Card et al. 2019). However, the correlation is not significant; in fact, it is weakly  
252 positive ( $r = 0.1682$ , two-tailed  $p = 0.5655$ ). We also computed the correlation between the log-  
253 transformed fitnesses and log-transformed fold-increases in resistance, but again the correlation  
254 is weakly positive and not significant ( $r = 0.1002$ , two-tailed  $p = 0.7332$ ). Thus, we find no  
255 evidence that the variation in the fitness cost of tetracycline resistance is related to the level of  
256 resistance conferred by the underlying mutations.

257

## 258 **GENETIC BACKGROUND DOES NOT EXPLAIN THE VARIATION IN FITNESS** 259 **COST**

260 The 14 tetracycline-resistant mutants with identifiable mutations evolved on five different  
261 genetic backgrounds. We asked whether the average cost of resistance differed between the  
262 backgrounds. In this case, the ANOVA tests whether the variance in the average cost of

263 resistance for mutants derived from different backgrounds is greater than expected given the  
264 variance in the average cost for mutants derived from the same background. This analysis  
265 indicates no significant effect of the genetic background on the cost of resistance ( $F_{4,9} = 0.47, p =$   
266  $0.7570$ ).

267

## 268 **IDIOSYNCRATIC DIFFERENCES BETWEEN MUTANT LINES IN THE COST OF** 269 **RESISTANCE**

270 Neither the level of phenotypic resistance conferred by mutations nor the genetic background in  
271 which they arose explains the substantial variation in the fitness effects of tetracycline resistance.  
272 Instead, it appears there are idiosyncratic differences in the fitness costs associated with different  
273 resistance mutations (Fig. 1B). These idiosyncratic effects could, in principle, reflect mutations  
274 in different genes, different mutations in the same target gene, secondary mutations that might  
275 have hitchhiked with the mutations conferring resistance, or epistatic interactions between any of  
276 these new mutations and the existing mutations that distinguished the different parental strains.  
277 Without a much larger number of resistant lines, it is not possible to rigorously disentangle these  
278 various sources of idiosyncratic fitness costs. However, by examining and contrasting specific  
279 cases, we are able to shed light on some of the sources of these differences.

280 Two resistant clones, Ara+4-3 and Ara+5-2, have fitness costs that are very similar to one  
281 another, but more than double the cost of any of the other 12 resistant mutants (Fig. 3). Yet these  
282 two cases occurred on different genetic backgrounds and have different mutations. Ara+4-3 has  
283 mutations in *hms*, which encodes a histone-like global regulator, and *lpcA*, which encodes a  
284 phosphoheptose isomerase; Ara+5-2 has a single mutation in *ompF*, which encodes an outer-  
285 membrane porin (Card et al. 2020). We asked whether these two extreme cases are solely

286 responsible for the heterogeneity in fitness costs by performing an ANOVA that excludes them.  
287 The variation in fitness costs among the other 12 clones is reduced, but it nonetheless remains  
288 highly significant ( $F_{11,48} = 4.44, p = 0.0001$ ).

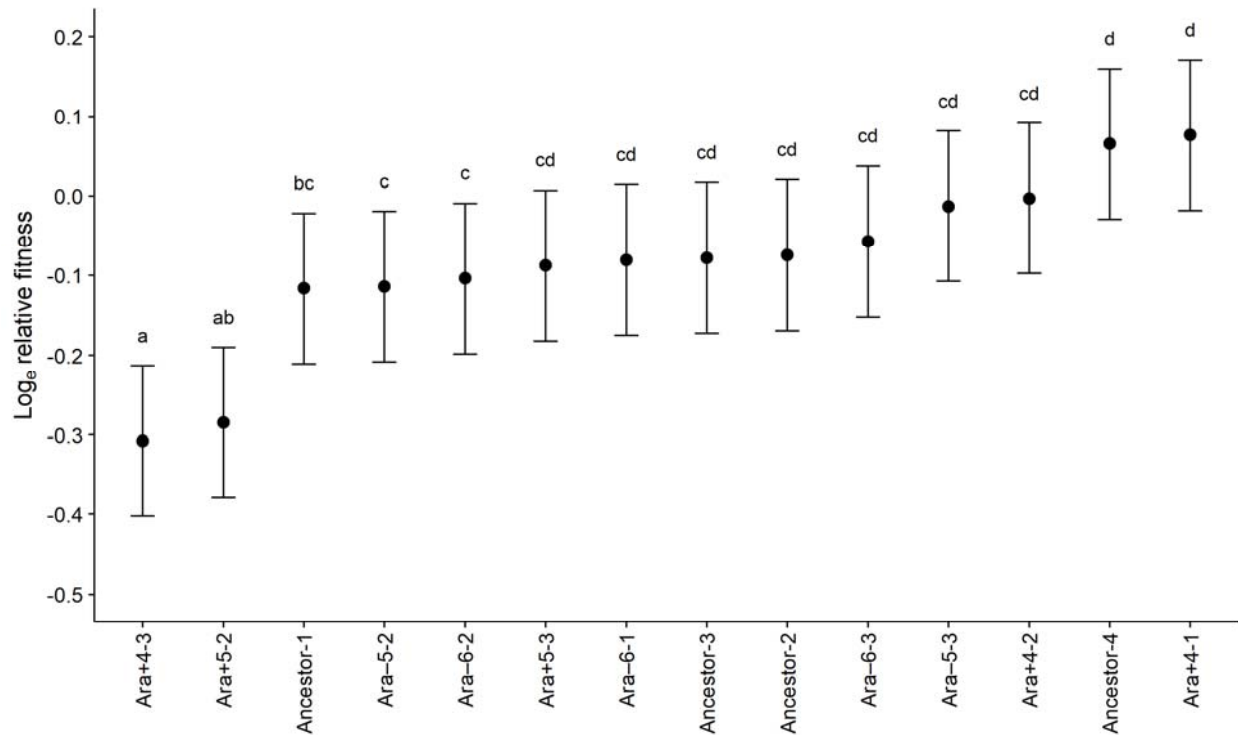

289

290 **Figure 3.** Fitnesses of 14 tetracycline-resistant mutants relative to their parental strains. The  
291 mutants are arranged from lowest to highest fitness. Each symbol shows the mean  $\log_e$ -  
292 transformed fitness, based on 5-fold replication of paired fitness assays. Error bars show 95%  
293 confidence limits calculated using the  $t$ -distribution with 4 d.f. and the pooled standard deviation  
294 estimated from the ANOVA (Table 1). Letters above the error bars identify mutants with relative  
295 fitnesses that are not significantly different, based on Tukey’s “honestly significant difference”  
296 test for multiple comparisons.

297 Nine of the 14 resistant clones have a single mutation each, while four of them (Ara-5-2,  
298 Ara-6-2, Ara+4-3, Ara+5-3) have two mutations, and another (Ancestor-2) has three mutations  
299 (Card et al. 2020). It is reasonable to imagine that in each clone one mutation confers the drug

300 resistance, while the others merely hitchhiked with the resistance mutation. Such hitchhikers  
301 might include deleterious mutations that reduce fitness. Therefore, we compared the fitness costs  
302 for the resistant clones with and without secondary mutations. The average fitness cost of the  
303 clones with multiple mutations is higher (13.8%) than the average of those with single mutations  
304 (5.5%), but the difference is only marginally nonsignificant given the small number of clones in  
305 each group and the high variation within each group (Welch's  $t$ -test,  $t_s = 1.4751$ , 9.3 d.f., one-  
306 tailed  $p = 0.0866$ ).

307         It is also interesting to compare the four resistant clones derived from the ancestral LTEE  
308 background. All four resistant clones evolved the same level of phenotypic resistance, with MICs  
309 that are 4-fold higher than their parental strain (Card et al. 2019). Moreover, all four have  
310 mutations affecting the same two-component system that regulates the synthesis of outer-  
311 membrane proteins: one clone (Ancestor-1) has a 11-bp deletion in *envZ*, which encodes the  
312 sensory histidine kinase; the others (Ancestor-2, Ancestor-3, Ancestor-4) have nonsynonymous  
313 mutations in *ompR*, which encodes the DNA-binding response regulator. Even with these  
314 striking phenotypic and genetic similarities, an ANOVA shows significant heterogeneity in the  
315 fitness of these clones ( $F_{3,16} = 4.50$ ,  $p = 0.0180$ ). We can also compare only Ancestor-3 and  
316 Ancestor-4 (each having a single mutation in *ompR* and no other mutation), and the variation in  
317 fitness remains significant ( $F_{1,8} = 5.71$ ,  $p = 0.0439$ ). These results show that different mutations  
318 in the same target pathway, and even different alleles of the same gene, can lead to different  
319 fitness costs of drug resistance.

320



## 321 *Discussion*

322 In previous work, we examined the role that genetic background plays in both the phenotypic  
323 and genotypic evolution of antibiotic resistance. First, we examined the potential of several  
324 different LTEE backgrounds to evolve increased resistance to several antibiotics. We found that  
325 evolvability was idiosyncratic with respect to the parental genotype, such that resistance was  
326 more constrained in some backgrounds than in others (Card et al., 2019). Genetic differences  
327 will accumulate between populations, even if they evolve in the same permissive environment.  
328 These differences can unpredictably alter their ability to respond evolutionarily when challenged  
329 with antibiotics. Second, we sequenced the complete genomes of some of these resistant mutants  
330 and assessed whether the different initial genotypes took similar or divergent mutational paths to  
331 increased resistance (Card et al. 2020). Again, we found that the initial genetic background is  
332 important. On average, the replicate lines that evolved from the same founding genotypes had  
333 more gene-level mutations in common than lines derived from different founding genotypes.

334         The aim of this study was to examine whether and how genetic background influences  
335 the fitness effects of resistance mutations in the absence of antibiotic. In particular, we examined  
336 the fitness costs of tetracycline resistance in 16 lines that evolved from five sensitive parental  
337 backgrounds. We found that the resistant lines are, on average, less fit than their sensitive  
338 counterparts in the absence of the antibiotic. This result is not surprising, given that resistance  
339 mutations often disrupt the normal function of metabolic or physiological processes, or impose  
340 energetic demands that reduce growth and competitiveness (Andersson and Hughes 2010). We  
341 also observed highly significant variation among the resistant lines in their fitness costs (Table  
342 1). This variation remained substantial (Fig. 3) even after we excluded two strains without  
343 identified mutations (Card et al. 2020). These two strains exhibited phenotypic resistance in our

344 earlier work (Card et al. 2019), but that resistance might have been conferred by unstable  
345 genomic changes, such as gene amplifications or frameshift mutations in homopolymeric tracts  
346 that can cause “phase variation” (Moxon et al. 1994). If so, these unstable changes could have  
347 reverted prior to the genomic analysis and the competition assays that we performed.

348         We then addressed two broad possibilities regarding the variation in fitness cost between  
349 the 14 lines with known, stable mutations. First, we asked whether there is a relation between a  
350 line’s phenotypic resistance and its fitness cost, such that mutations that confer greater resistance  
351 are more costly (Fig. 1A). A meta-analysis of fitness costs across several species and drug  
352 classes by Melnyk and colleagues (2015) supported this association, and the authors suggested it  
353 could be understood from evolutionary and mechanistic perspectives. Imagine a population that  
354 is well-adapted to one environment and hence near a local fitness optimum. If the environment  
355 changes, such as with the addition of an antibiotic, then the population may evolve toward a  
356 different optimum through the substitution of new mutations. Mutations of large effect will bring  
357 the population closer to this new optimum than mutations of small effect. However, if the  
358 environment later reverts to its previous state, then populations that substituted the large-effect  
359 mutations will be further from their previous optimum than those populations that acquired  
360 small-effect mutations. From a mechanistic standpoint, the increased expression of efflux pumps  
361 or drug targets diverts resources from other cellular processes. Also, resistance mutations that  
362 change evolutionarily conserved proteins are more likely to disrupt their functions than improve  
363 them. In our study, however, there was no significant association between fitness costs and the  
364 level of resistance conferred by mutations, whether on an absolute basis or relative to the parent  
365 strain.

366           The second broad possibility is that the fitness costs of resistance can vary for reasons  
367 unrelated to the level of resistance conferred (Fig. 1B). There are several potential reasons for  
368 such idiosyncratic variation. One possibility is that the same resistance mutation may have  
369 different fitness costs in different genetic backgrounds. In *Campylobacter jejuni*, for example, a  
370 C257T mutation in the gene *gyrA* confers fluoroquinolone resistance. When fluoroquinolone-  
371 resistant and -susceptible strains were inoculated separately into chickens, they colonized equally  
372 well and each persisted even in the absence of drug exposure (Luo et al. 2005). However, when  
373 resistant and sensitive strains were co-inoculated, the resistant variants often prevailed. Further  
374 work indicated that this particular *gyrA* mutation was beneficial in some genetic backgrounds,  
375 even in the absence of antibiotic, and costly in others (Luo et al. 2005). In our study, by contrast,  
376 the variation in fitness costs among strains was not explained by genetic-background effects, but  
377 instead involved several other factors.

378           One such factor is that resistance mutations can occur in different genes, which can lead  
379 to different fitness costs. In this study, the relative fitnesses of clones Ara+4-3 and Ara+5-2 were  
380 significantly lower than the other 12 strains. Ara+4-3 is the only line with mutations in either  
381 *lpcA* or *hns*. Mutations in the former gene have been shown to confer tigecycline resistance in *E.*  
382 *coli* through modifications to the lipopolysaccharide biosynthesis pathway, and these mutations  
383 have moderate fitness costs in vitro (Linkevicius et al. 2013, 2016). The latter gene encodes the  
384 global transcriptional regulator H-NS, and mutations in it affect acid resistance (Giangrossi et al.  
385 2005), the modulation of osmotic stress (Lucht et al. 1994), and several other important cellular  
386 processes. Changes to this regulator's structure and function might therefore have large fitness  
387 costs via widespread pleiotropic effects. The Ara+5-2 clone evolved a 9-bp insertion in *ompF*,  
388 which encodes the sole major porin in the LTEE ancestral strain (Croizat et al. 2011); this

389 mutation presumably reduces the cell's antibiotic uptake, but at the expense of acquiring  
390 nutrients (Ferenci 2005; Phan and Ferenci 2017). Thus, resistance mutations that affect different  
391 cellular pathways and functions can have variable fitness costs, a finding that is consistent with  
392 many other studies (Vogwill and MacLean 2015).

393 Another factor is that mutations in different genes that are part of the same physiological  
394 pathway may confer similar resistance levels but have different fitness costs. In our study, four  
395 tetracycline-resistant lines derive from the same LTEE ancestor: one had a mutation in *envZ*,  
396 while the other three had mutations in *ompR*. These genes encode proteins that comprise a two-  
397 component regulatory system that regulates cellular responses to osmotic stress, and which  
398 affects antibiotic resistance through altered expression of the major porin OmpF (Chakraborty  
399 and Kenney 2018; Choi and Lee 2019). We observed significant heterogeneity in fitness even  
400 among these lines, implying that different changes within this one pathway can impose unique  
401 burdens. The evolution of carbapenem resistance in *E. coli* K12 can also occur by mutations in  
402 this same two-component system, again with variable fitness costs (Adler et al. 2013). In their  
403 study, Adler and colleagues (2013) found that *envZ* mutants had no measurable loss of fitness in  
404 the absence of antibiotic, whereas *ompR* mutations suffered a large cost. By contrast, in our study  
405 the *envZ* mutation was more costly, which may reflect differences between the *E. coli* K12 and B  
406 strain backgrounds or the use of different culture media.

407 Yet another factor is that different mutations in the same gene can have different costs.  
408 The evolution of rifampicin resistance, for example, typically occurs via mutations in several  
409 canonical regions of *rpoB*, which encodes the  $\beta$  subunit of the RNA polymerase (Reynolds 2000;  
410 Ahmad et al. 2002; Barrick et al. 2010; MacLean et al. 2010; Hall and MacLean 2011). Different  
411 alleles have widely varying costs that impact their competitive ability and, moreover, affect the

412 dynamics of subsequent compensatory evolution (Barrick et al. 2010). In our study, two clones  
413 derived from the same parent had different nonsynonymous mutations in *ompR*. Both conferred  
414 the same level of resistance to tetracycline, but they had different fitness costs in the absence of  
415 the drug. Such differences can have important public-health consequences, because a resistant  
416 lineage's competitive fitness in the absence of antibiotics is critically important for its long-term  
417 persistence in a heterogeneous environment.

418 More generally, we argue that further studies of the fitness costs of antibiotic resistance  
419 are needed, because this phenomenon can inform treatment strategies. Standard clinical practice  
420 calls for aggressive treatment to eliminate an infecting pathogen before it has time to evolve  
421 resistance (Craig 2001; Drlica 2003; Mehrotra et al. 2004; Abdul-Aziz et al. 2015; Hansen et al.  
422 2020). This approach is likely beneficial if the population is composed of only drug-susceptible  
423 cells. However, if the pathogen population already contains drug-resistant cells, then aggressive  
424 treatment may promote the proliferation of the resistant population by eliminating susceptible  
425 competitors. To address this problem, an alternative treatment strategy was recently proposed  
426 (Day and Read 2016; Hansen et al. 2020). Given that resistance often imposes a cost, resistant  
427 variants might be at a competitive disadvantage relative to their sensitive counterparts at low  
428 antibiotic concentrations that nonetheless reduce the growth rate of both types. If so, the resulting  
429 competition might slow the resistant population's expansion long enough for the immune system  
430 to clear the infection.

431 Both mathematical models (Hansen et al. 2017) and experiments with the LTEE ancestor  
432 (Hansen et al. 2020) have shown that competition between susceptible and resistant populations,  
433 mediated in part by fitness costs, can indeed slow the time to treatment failure. However, these  
434 expectations are complicated by (i) the potential for higher mutation rates, and (ii) idiosyncratic

435 fitness costs that depend on the specific resistance mutation and its interaction with the genetic  
436 background in which it occurs. Regarding the first complication, Hansen and colleagues (2020)  
437 used a strain with a low mutation rate (Sniegowski et al. 1997). However, six LTEE populations  
438 evolved hypermutability by generation 50,000 (Tenaillon et al. 2016), and mutation rates vary in  
439 some pathogens by orders of magnitude (Hughes and Andersson 2017). With respect to the  
440 second complication, the competitive release of a resistant population should occur faster when  
441 fitness costs are lower. Given that the cost may depend on the particular mutation and its genetic  
442 background, the time to treatment failure is harder to predict. We think that these issues and their  
443 relevance for treatment options are important avenues for future research.

444 **LITERATURE CITED**

- 445
- 446 Abdul-Aziz, M. H., J. Lipman, J. W. Mouton, W. W. Hope, and J. A. Roberts. 2015. Applying  
447 pharmacokinetic/pharmacodynamic principles in critically ill patients: Optimizing efficacy  
448 and reducing resistance development. *Semin. Respir. Crit. Care Med.* 36:136–153.  
449
- 450 Adler, M., M. Anjum, D. I. Andersson, and L. Sandegren. 2013. Influence of acquired  $\beta$ -  
451 lactamases on the evolution of spontaneous carbapenem resistance in *Escherichia coli*. *J.*  
452 *Antimicrob. Chemother.* 68:51–59.  
453
- 454 Ahmad, S., E. Mokaddas, and E. Fares. 2002. Characterization of *rpoB* mutations in rifampin-  
455 resistant clinical *Mycobacterium tuberculosis* isolates from Kuwait and Dubai. *Diagn.*  
456 *Microbiol. Infect. Dis.* 44:245–252.  
457
- 458 Andersson, D. I., and D. Hughes. 2010. Antibiotic resistance and its cost: is it possible to reverse  
459 resistance? *Nat. Rev. Microbiol.* 8:260–271.  
460
- 461 Barrick, J. E., M. R. Kauth, C. C. Strelhoff, and R. E. Lenski. 2010. *Escherichia coli rpoB*  
462 mutants have increased evolvability in proportion to their fitness defects. *Mol. Biol. Evol.*  
463 27:1338–1347.  
464
- 465 Björkman, J., D. Hughes, and D. I. Andersson. 1998. Virulence of antibiotic-resistant *Salmonella*  
466 *typhimurium*. *Proc. Natl. Acad. Sci.* 95:3949–3953.  
467
- 468 Blair, J. M. A., M. A. Webber, A. J. Baylay, D. O. Ogbolu, and L. J. V. Piddock. 2015.  
469 Molecular mechanisms of antibiotic resistance. *Nat. Rev. Microbiol.* 13:42–51.  
470
- 471 Böttger, E. C., B. Springer, M. Pletschette, and P. Sander. 1998. Fitness of antibiotic-resistant  
472 microorganisms and compensatory mutations. *Nat. Med.* 4:1343–1344.  
473
- 474 Bouma, J. E., and R. E. Lenski. 1988. Evolution of a bacteria/plasmid association. *Nature*  
475 335:351–352.  
476
- 477 Card, K. J., T. LaBar, J. B. Gomez, and R. E. Lenski. 2019. Historical contingency in the  
478 evolution of antibiotic resistance after decades of relaxed selection. *PLoS Biol.*  
479 17:e3000397.  
480
- 481 Card, K. J., M. D. Thomas, J. L. Graves Jr., J. E. Barrick, and R. E. Lenski. 2020. Genomic  
482 evolution of antibiotic resistance is contingent on genetic background following a long-term  
483 experiment with *Escherichia coli*. bioRxiv 2020.08.19.258384.  
484
- 485 Chakraborty, S., and L. J. Kenney. 2018. A new role of OmpR in acid and osmotic stress in  
486 *Salmonella* and *E. coli*. *Front. Microbiol.* 9.  
487
- 488 Choi, U., and C.-R. Lee. 2019. Distinct roles of outer membrane porins in antibiotic resistance  
489 and membrane integrity in *Escherichia coli*. *Front. Microbiol.* 10.  
490

- 491 Craig, W. A. 2001. Re-evaluating current antibiotic therapy. *Respir. Med.* 95:S12–S19.  
492
- 493 Crozat, E., T. Hindré, L. Kühn, J. Garin, R. E. Lenski, and D. Schneider. 2011. Altered  
494 regulation of the OmpF porin by Fis in *Escherichia coli* during an evolution experiment and  
495 between B and K-12 strains. *J. Bacteriol.* 193:429–440.  
496
- 497 Daegelen, P., F. W. Studier, R. E. Lenski, S. Cure, and J. F. Kim. 2009. Tracing ancestors and  
498 relatives of *Escherichia coli* B, and the derivation of B strains REL606 and BL21(DE3). *J.*  
499 *Mol. Biol.* 394:634–643.  
500
- 501 Day, T., and A. F. Read. 2016. Does high-dose antimicrobial chemotherapy prevent the  
502 evolution of resistance? *PLoS Comput. Biol.* 12:e1004689.  
503
- 504 Drlica, K. 2003. The mutant selection window hypothesis and antimicrobial resistance. *J.*  
505 *Antimicrob. Chemother.* 52:11–17.  
506
- 507 Enne, V. I., A. A. Delsol, G. R. Davis, S. L. Hayward, J. M. Roe, and P. M. Bennett. 2005.  
508 Assessment of the fitness impacts on *Escherichia coli* of acquisition of antibiotic resistance  
509 genes encoded by different types of genetic element. *J. Antimicrob. Chemother.* 56:544–  
510 551.  
511
- 512 Ferenci, T. 2005. Maintaining a healthy SPANC balance through regulatory and mutational  
513 adaptation. *Mol. Microbiol.* 57:1–8.  
514
- 515 Giangrossi, M., S. Zattoni, A. Tramonti, D. De Biase, and M. Falconi. 2005. Antagonistic role of  
516 H-NS and GadX in the regulation of the glutamate decarboxylase-dependent acid resistance  
517 system in *Escherichia coli*. *J. Biol. Chem.* 280:21498–21505.  
518
- 519 Hall, A. R., and R. C. MacLean. 2011. Epistasis buffers the fitness effects of rifampicin-  
520 resistance mutations in *Pseudomonas aeruginosa*. *Evolution* 65:2370–2379.  
521
- 522 Hansen, E., R. J. Woods, and A. F. Read. 2017. How to use a chemotherapeutic agent when  
523 resistance to it threatens the patient. *PLoS Biol.* 15:e2001110.  
524
- 525 Hansen, E., J. Karlake, R. J. Woods, A. F. Read, and K. B. Wood. 2020. Antibiotics can be used  
526 to contain drug-resistant bacteria by maintaining sufficiently large sensitive populations.  
527 *PLoS Biol.* 18:e3000713.  
528
- 529 Hughes, D., and D. I. Andersson. 2017. Evolutionary trajectories to antibiotic resistance. *Annu.*  
530 *Rev. Microbiol.* 71:579–596.  
531
- 532 Kugelberg, E., S. Löfmark, B. Wretling, and D. I. Andersson. 2005. Reduction of the fitness  
533 burden of quinolone resistance in *Pseudomonas aeruginosa*. *J. Antimicrob. Chemother.*  
534 55:22–30.  
535
- 536 Lenski, R. E., and J. E. Bouma. 1987. Effects of segregation and selection on instability of  
537 pACYC184 in *Escherichia coli* B. *J. Bacteriol.* 169:5314–5316.



- 538  
539 Lenski, R. E., M. R. Rose, S. C. Simpson, and S. C. Tadler. 1991. Long-term experimental  
540 evolution in *Escherichia coli*. I. Adaptation and divergence during 2,000 generations. *Am.*  
541 *Nat.* 138:1315–1341.  
542
- 543 Lenski, R. E. 1997. The cost of antibiotic resistance—from the perspective of a bacterium. Pp.  
544 131–151 in D. J. Chadwick and G. Cardew, eds. *Antibiotic Resistance: Origins, Evolution,*  
545 *Selection and Spread.* Wiley, Chichester, UK.  
546
- 547 Lenski, R. E., M. J. Wiser, N. Ribeck, Z. D. Blount, J. R. Nahum, J. J. Morris, L. Zaman, C. B.  
548 Turner, B. D. Wade, R. Maddamsetti, A. R. Burmeister, E. J. Baird, J. Bundy, N. A. Grant,  
549 K. J. Card, M. Rowles, K. Weatherspoon, S. E. Papoulis, R. Sullivan, C. Clark, J. S. Mulka,  
550 and N. Hajela. 2015. Sustained fitness gains and variability in fitness trajectories in the  
551 long-term evolution experiment with *Escherichia coli*. *Proc. R. Soc. B* 282:20152292.  
552
- 553 Lenski, R. E. 2017. Convergence and divergence in a long-term experiment with bacteria. *Am.*  
554 *Nat.* 190:S57–S68.  
555
- 556 Levin, B. R., M. Lipsitch, V. Perrot, S. Schrag, R. Antia, L. Simonsen, N. Moore Walker, and F.  
557 M. Stewart. 1997. The population genetics of antibiotic resistance. *Clin. Infect. Dis.* 24:S9–  
558 S16.  
559
- 560 Lindgren, P. K., Å. Karlsson, and D. Hughes. 2003. Mutation rate and evolution of  
561 fluoroquinolone resistance in *Escherichia coli* isolates from patients with urinary tract  
562 infections. *Antimicrob. Agents Chemother.* 47:3222–3232.  
563
- 564 Linkevicius, M., L. Sandegren, and D. I. Andersson. 2013. Mechanisms and fitness costs of  
565 tigecycline resistance in *Escherichia coli*. *J. Antimicrob. Chemother.* 68:2809–2819.  
566
- 567 Linkevicius, M., J. M. Andersson, L. Sandegren, and D. I. Andersson. 2016. Fitness of  
568 *Escherichia coli* mutants with reduced susceptibility to tigecycline. *J. Antimicrob.*  
569 *Chemother.* 71:1307–1313.  
570
- 571 Lucht, J. M., P. Dersch, B. Kempf, and E. Bremer. 1994. Interactions of the nucleoid-associated  
572 DNA-binding protein H-NS with the regulatory region of the osmotically controlled *proU*  
573 operon of *Escherichia coli*. *J. Biol. Chem.* 269:6578–6586.  
574
- 575 Luo, N. S. Pereira, O. Sahin, J. Lin, S. Huang., L. Michel, and Q. Zhang. 2005. Enhanced *in vivo*  
576 fitness of fluoroquinolone-resistant *Campylobacter jejuni* in the absence of antibiotic  
577 selection pressure. *Proc. Natl. Acad. Sci.* 102:541–546.  
578
- 579 MacLean, R. C., G. G. Perron, and A. Gardner. 2010. Diminishing returns from beneficial  
580 mutations and pervasive epistasis shape the fitness landscape for rifampicin resistance in  
581 *Pseudomonas aeruginosa*. *Genetics* 186:1345–1354.  
582
- 583 Marcusson, L. L., N. Frimodt-Møller, and D. Hughes. 2009. Interplay in the selection of  
584 fluoroquinolone resistance and bacterial fitness. *PLoS Pathog.* 5:e1000541.

- 585  
586 Mehrotra, R., R. De Gaudio, and M. Palazzo. 2004. Antibiotic pharmacokinetic and  
587 pharmacodynamic considerations in critical illness. *Intensive Care Med.* 30:2145–2156.  
588
- 589 Melnyk, A. H., A. Wong, and R. Kassen. 2015. The fitness costs of antibiotic resistance  
590 mutations. *Evol. Appl.* 8:273–283.  
591
- 592 Moxon, E. R., P. B. Rainey, M. A. Nowak, and R. E. Lenski. 1994. Adaptive evolution of highly  
593 mutable loci in pathogenic bacteria. *Curr. Biol.* 4:24–33.  
594
- 595 Nguyen, T. N. M., Q. G. Phan, L. P. Duong, K. P. Bertrand, and R. E. Lenski. 1989. Effects of  
596 carriage and expression of the *Tn10* tetracycline-resistance operon on the fitness of  
597 *Escherichia coli* K12. *Mol. Biol. Evol.* 6:213–225.  
598
- 599 Nilsson, A. I., A. Zorzet, A. Kanth, S. Dahlström, O. G. Berg, and D. I. Andersson. 2006.  
600 Reducing the fitness cost of antibiotic resistance by amplification of initiator tRNA genes.  
601 *Proc. Natl. Acad. Sci.* 103:6976–6981.  
602
- 603 Phan, K., and T. Ferenci. 2017. The fitness costs and trade-off shapes associated with the  
604 exclusion of nine antibiotics by OmpF porin channels. *ISME J.* 11:1472–1482.  
605
- 606 Reynolds, M. G. 2000. Compensatory evolution in rifampicin-resistant *Escherichia coli*.  
607 *Genetics* 156:1471–1481.  
608
- 609 Santos-Lopez, A., C. W. Marshall, M. R. Scribner, D. J. Snyder, and V. S. Cooper. 2019.  
610 Evolutionary pathways to antibiotic resistance are dependent upon environmental structure  
611 and bacterial lifestyle. *eLife* 8:e47612.  
612
- 613 Schrag, S. J., V. Perrot, and B. R. Levin. 1997. Adaptation to the fitness costs of antibiotic  
614 resistance in *Escherichia coli*. *Proc. R. Soc. B* 264:1287–1291.  
615
- 616 Sjölund, M., K. Wreiber, D. I. Andersson, M. J. Blaser, and L. Engstrand. 2003. Long-term  
617 persistence of resistant *Enterococcus* species after antibiotics to eradicate *Helicobacter*  
618 *pylori*. *Ann. Intern. Med.* 139:483–487.  
619
- 620 Sniegowski, P. D., P. J. Gerrish, and R. E. Lenski. 1997. Evolution of high mutation rates in  
621 experimental populations of *E. coli*. *Nature* 387:703–705.  
622
- 623 Sommer, M. O. A., G. M. Church, and G. Dantas. 2010. The human microbiome harbors a  
624 diverse reservoir of antibiotic resistance genes. *Virulence* 1:299–303.  
625
- 626 Tenaille, O., J. E. Barrick, N. Ribbeck, D. E. Deatherage, J. L. Blanchard, A. Dasgupta, G. C.  
627 Wu, S. Wielgoss, S. Cruveiller, C. Médigue, D. Schneider, and R. E. Lenski. 2016. Tempo  
628 and mode of genome evolution in a 50,000-generation experiment. *Nature* 536:165–170.  
629
- 630 Trindade, S., A. Sousa, K. B. Xavier, F. Dionisio, M. G. Ferreira, and I. Gordo. 2009. Positive  
631 epistasis drives the acquisition of multidrug resistance. *PLoS Genet.* 5:e1000578.

- 632  
633 Tubulekas, I., and D. Hughes. 1993. Suppression of *rpsL* phenotypes by *tuf* mutations reveals a  
634 unique relationship between translation elongation and growth rate. *Mol. Microbiol.* 7:275–  
635 284.  
636  
637 Vogwill, T., and R. C. MacLean. 2015. The genetic basis of the fitness costs of antimicrobial  
638 resistance: a meta-analysis approach. *Evol. Appl.* 8:284–295.  
639  
640 Vogwill, T., M. Kojadinovic, and R. C. MacLean. 2016. Epistasis between antibiotic resistance  
641 mutations and genetic background shape the fitness effect of resistance across species of  
642 *Pseudomonas*. *Proc. R. Soc. B* 283:20160151.  
643  
644 Wisner, M. J., N. Ribeck, and R. E. Lenski. 2013. Long-term dynamics of adaptation in asexual  
645 populations. *Science* 342:1364–1367.

646 **Table S1.** Bacterial strains used in this study.

| <b>Evolved tetracycline-resistant clones</b>   |                        |                   |
|------------------------------------------------|------------------------|-------------------|
| <b>Strain name</b>                             | <b>Derived from</b>    | <b>Freezer ID</b> |
| Ancestor-1                                     | REL606                 | KJC60             |
| Ancestor-2                                     | REL606                 | KJC61             |
| Ancestor-3                                     | REL606                 | KJC62             |
| Ancestor-4                                     | REL606                 | KJC63             |
| Ara-5-1                                        | REL11339               | KJC66             |
| Ara-5-2                                        | REL11339               | KJC74             |
| Ara-5-3                                        | REL11339               | KJC82             |
| Ara-6-1                                        | REL11389               | KJC67             |
| Ara-6-2                                        | REL11389               | KJC75             |
| Ara-6-3                                        | REL11389               | KJC83             |
| Ara+4-1                                        | REL11348               | KJC64             |
| Ara+4-2                                        | REL11348               | KJC72             |
| Ara+4-3                                        | REL11348               | KJC80             |
| Ara+5-1                                        | REL11367               | KJC65             |
| Ara+5-2                                        | REL11367               | KJC73             |
| Ara+5-3                                        | REL11367               | KJC81             |
| <b>Tetracycline-sensitive parental strains</b> |                        |                   |
| <b>LTEE population</b>                         | <b>LTEE generation</b> | <b>Freezer ID</b> |
| Ancestor                                       | 0                      | REL606            |
| Ara-5                                          | 50,000                 | REL11339          |
| Ara-6                                          | 50,000                 | REL11389          |
| Ara+4                                          | 50,000                 | REL11348          |
| Ara+5                                          | 50,000                 | REL11367          |
| <b>Strains used as common competitors</b>      |                        |                   |
| <b>LTEE population</b>                         | <b>LTEE generation</b> | <b>Freezer ID</b> |
| Ancestor                                       | 0                      | REL607            |
| Ara-5                                          | 40,000                 | REL10948          |
| Ara-5                                          | 40,000                 | REL11638          |

647
